# Supplementary material for: Magma storage conditions of Lascar andesites, central volcanic zone, Chile
Source: Copernicus journal article supplement (doi:10.5194/ejm-36-721-2024), 2024-09-09
Supplement: Supplementary file 1 [file ejm-36-721-2024-supplement.zip]

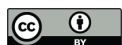

## *Supplement of*

# **Magma storage conditions of Lascar andesites, central volcanic zone, Chile**

**André Stechern et al.**

*Correspondence to:* André Stechern ([andre.stechern@bgr.de](mailto:andre.stechern@bgr.de))

- [ejm-36-721-2024-supplement-title-page.pdf](#)
- [Supplement\\_Tables.xlsx](#)
- [Supplements.docx](#)

The copyright of individual parts of the supplement might differ from the article licence.
